# Supplementary material for: Blockade of Endothelin Receptors Mitigates SARS-CoV-2-induced Osteochondral Damage
Source: Research Square preprint supplement (doi:10.21203/rs.3.rs-3080850/v1), 2023-07-14
Supplement: Supplementary file 1 [file d90810a9dcdbc3e424d29a40.docx]

**Supplementary Table 1 Primer sequence for real-time polymerase chain reaction**

| **Genes** | **Forward Primer (5’-3’)** | **Reverse Primer (5’-3’)** |
| --- | --- | --- |
| **Human-GAPDH** | AGGGCTGCTTTTAACTCTGGTAAA | GAATTTGCCATGGGTGGAAT |
| **Human-EDN1** | GACATCATTTGGGTCAACACTC | GGCATCTATTTTCACGGTCTGT |
| **Human-EDNRA** | TGGTGTGCACTGCGATCTTCTACA | ACGGCTTAAATGAAGAGGGAACCA |
| **Human-EDNRB** | ATCTGCGAATCTGCTTGCTT | TCCCGTCTCTGCTTTAGGTG |
| **Human-p16INK4a** | CCCAACGCACCGAATAGTTA | ACCAGCGTGTCCAGGAAG |
| **Human-RANKL** | CCATGTTCGTGGCCCTCC | GCAGTGAGTGCCATCTTCTG |
| **Human-MMP1** | ATGAAGCAGCCCAGATGTGGAG | TGGTCCACATCTGCTCTTGGCA |
| **Human-MMP13** | CCTTGATGCCATTACCAGTCTCC | AAACAGCTCCGCATCAACCTGC |
